# Supplementary material
Source: bioRxiv or medRxiv preprint supplement (https://www.biorxiv.org/highwire/filestream/94532/field_highwire_adjunct_files/7/307934-8.pdf)
Supplement: Supplementary file [file 307934-8.pdf]

## Supplementary Tables

**Supplementary Table 1. List of transcription factors obtained from top 25 genes associated with differentially expressed modules in Class1 and Class2**

| Class 1   |           | Class 2   |          |          |
|-----------|-----------|-----------|----------|----------|
| Module 1a | Module 11 | Module 1b | Module 3 | Module 9 |
| ZNF219    | FOXL2     | AIF1      | SNAI2    | ETV7     |
| SALL2     | GATA4     |           |          |          |
| KCNIP3    | PEG3      |           |          |          |
| TCF7L1    | TCF21     |           |          |          |
| SOX12     | GLI1      |           |          |          |

**Supplementary Table S2. Biomarker and Class Indices of normal and HGSC cases in TMA leads to Class identification**

| TMA cores | Biomarker Index     |                    |                    |                  | Class Index     |                 |
|-----------|---------------------|--------------------|--------------------|------------------|-----------------|-----------------|
|           | BI <sub>TCF21</sub> | BI <sub>CDH1</sub> | BI <sub>Slug</sub> | BI <sub>HA</sub> | CI <sub>E</sub> | CI <sub>M</sub> |
| A1, B1    | 0.61                | 0.56               | 0.61               | 0.78             | 0.58            | 0.69            |
| A2, B2    | 0.83                | 0.19               | 0.56               | 0.78             | 0.51            | 0.67            |
| A6, B6    | 0.72                | 0.89               | 0.00               | 0.78             | 0.81            | 0.39            |
| C1, D1    | 0.72                | 0.89               | 0.72               | 0.78             | 0.81            | 0.75            |
| C2, D2    | 0.72                | 0.61               | 0.61               | 0.78             | 0.67            | 0.69            |
| C5, D5    | 0.72                | 0.78               | 0.00               | 1.00             | 0.75            | 0.5             |
| C7, D7    | 0.72                | 0.56               | 0.61               | 0.72             | 0.64            | 0.67            |
| C8, D8    | 0.72                | 0.61               | 0.31               | 0.78             | 0.67            | 0.54            |
| G6, H6    | 0.72                | 0.72               | 0.72               | 0.83             | 0.72            | 0.78            |
| G13, H13  | 0.72                | 0.89               | 0.61               | 0.78             | 0.81            | 0.69            |
| I3, J3    | 0.61                | 0.72               | 0.67               | 0.83             | 0.67            | 0.75            |
| I4, J4    | 0.67                | 0.67               | 0.67               | 0.89             | 0.67            | 0.78            |
| I9, J9    | 0.67                | 0.61               | 0.00               | 0.78             | 0.64            | 0.39            |
| I11, J11  | 0.72                | 0.44               | 0.61               | 0.78             | 0.58            | 0.69            |
| I13, J13  | 0.72                | 0.67               | 0.61               | 0.78             | 0.69            | 0.69            |

Normal ovary case core pairs – A1, B1 and A2, B2

HGSC case core pairs – A6, B6; C1, D1; C2, D2; C5, D5; C7, D7; C8, D8; G6, H6; G13, H13; I3, J3; I4, J4; I9, J9; I11, J11 and I13, J13

**Supplementary Table S3. Tumor tissues\*obtained from different sites in 96 clinical HGSC cases**

|                                      | T (1) | O (1) | A# (2)         | T - O (2) | T - O - FT (3) | T - FT (2) | A # (1) | FT- A # (2) |
|--------------------------------------|-------|-------|----------------|-----------|----------------|------------|---------|-------------|
| <b>Chemo-naïve</b>                   | 22    | 2     | 1              | 17        | 6              | 1          | 0       | 0           |
| <b>Chemo-treated</b>                 | 18    | 1     | 2              | 16        | 0              | 1          | 2       | 1           |
| <b>Pre- &amp; post-therapy pairs</b> | 3     | 0     | 3 <sup>§</sup> | 0         | 0              | 0          | 0       | 0           |

\* Ovarian (T), fallopian tube (FT), omental(O) tumors or ascites (A) were represented by at least one sample from the respective site; <sup>§</sup> Tumor tissues were available for ovarian tumors and/or ascites cell block as chemo-naïve and chemo-treated pairs; # ascites cell blocks; numbers in brackets indicate tissues from the same patient

**Supplementary Table S4. CI scores for chemo-naïve cases in ovarian tumors paired with omental tumor and fallopian tumor (n=6); chemo-naïve cases in unpaired ovarian tumors (n=22) and omental tumors (n=2); chemo-naïve cases in ovarian tumors paired with omental tumor and fallopian tumor, and ovarian tumor collected with ascites, chemo-treated cases in unpaired ovarian tumors (n=18) or omental tumor (n=1) or ascites cell block (n=2); chemo-**

treated cases in ovarian tumors paired with omental tumor (n=16) or ascites (n=2), fallopian tumor (n=1) and FT with ascites leading to class assignment

| Ovarian-Omentum-Fallopian Tube tumors |            |      |                 |                 |       |      |            |      |                 |                 |       |
|---------------------------------------|------------|------|-----------------|-----------------|-------|------|------------|------|-----------------|-----------------|-------|
| Case                                  | Tissue ID  | Pair | Cl <sub>E</sub> | Cl <sub>M</sub> | Class | Case | Tissue ID  | Pair | Cl <sub>E</sub> | Cl <sub>M</sub> | Class |
| 1                                     | B/1716/09  | T    | 0.17            | 0.3             | DP    | 4    | B/2774/12  | T    | 0.33            | 0.3             | DP    |
|                                       |            | O    | 0.24            | 0.3             | DP    |      |            | O    | 0.48            | 0.3             | DP    |
|                                       |            | F    | 0               | 0.3             | EMT   |      |            | F    | 0.19            | 0.3             | DP    |
| 2                                     | B/3136/09  | T    | 0.48            | 0.3             | CCM   | 5    | B/749/13   | T    | 0.52            | 0.5             | DP    |
|                                       |            | O    | 0.22            | 0               | CCM   |      |            | O    | 0.57            | 0.63            | DP    |
|                                       |            | F    | 0.65            | 0.26            | CCM   |      |            | F    | 0.57            | 0.3             | CCM   |
| 3                                     | B/825/10   | T    | 0.26            | 0.59            | EMT   | 6    | B/1627/13  | T    | 0.46            | 0.26            | CCM   |
|                                       |            | O    | 0.59            | 0.74            | DP    |      |            | O    | 0.19            | 0.26            | DP    |
|                                       |            | F    | 0.22            | 0.26            | DP    |      |            | F    | 0.19            | 0               | DP    |
| Unpaired Ovarian tumor                |            |      |                 |                 |       |      |            |      |                 |                 |       |
| Case                                  | Tissue ID  |      | Cl <sub>E</sub> | Cl <sub>M</sub> | Class | Case | Tissue ID  |      | Cl <sub>E</sub> | Cl <sub>M</sub> | Class |
| 1                                     | B/1102/08  |      | 0               | 0.22            | EMT   | 12   | B/1294/11  |      | 0.2             | 0.26            | DP    |
| 2                                     | B/2217/08  |      | 0.26            | 0               | CCM   | 13   | B/1920/11  |      | 0               | 0               | DP    |
| 3                                     | B/2263/08  |      | 0.22            | 0.26            | DP    | 14   | B/1338/13  |      | 0.26            | 0.7             | EMT   |
| 4                                     | B/2293/08  |      | 0               | 0               | DP    | 15   | B/3091/13  |      | 0.26            | 0               | CCM   |
| 5                                     | B/2281/09  |      | 0.69            | 0.64            | DP    | 16   | B/1781/14  |      | 0               | 0.52            | EMT   |
| 6                                     | B/3522/09  |      | 0               | 0.44            | EMT   | 17   | B/1519/15  |      | 0.89            | 0.26            | CCM   |
| 7                                     | B/22/10    |      | 0.2             | 0.48            | EMT   | 18   | B/2381/15  |      | 0.48            | 0.26            | CCM   |
| 8                                     | B/211/10   |      | 0.26            | 0.44            | DP    | 19   | B/2283/08  |      | 0               | 0               | DP    |
| 9                                     | B/799/10   |      | 0               | 0.3             | EMT   | 20   | HT/11/143  |      | 0               | 0               | DP    |
| 10                                    | B/804/10   |      | 0.48            | 0.3             | CCM   | 21   | HT/12/1743 |      | 0.46            | 0.52            | DP    |
| 11                                    | B/906/10   |      | 0               | 0.26            | EMT   | 22   | HT/361/13  |      | 0               | 0.22            | EMT   |
| Tumor in Omentum                      |            |      |                 |                 |       |      |            |      |                 |                 |       |
|                                       | Tissue ID  |      | Cl <sub>E</sub> | Cl <sub>M</sub> | Class | Case | Tissue ID  |      | Cl <sub>E</sub> | Cl <sub>M</sub> | Class |
|                                       | HT/13/1471 |      | 0.2             | 0.33            | DP    | 2    | HT/13/4397 |      | 0.81            | 0.26            | CCM   |
| Ovarian-Omentum tumor pairs           |            |      |                 |                 |       |      |            |      |                 |                 |       |
| Case                                  | Tissue ID  | Pair | Cl <sub>E</sub> | Cl <sub>M</sub> | Class | Case | Tissue ID  | Pair | Cl <sub>E</sub> | Cl <sub>M</sub> | Class |
| 1                                     | B/2981/09  | T    | 0               | 0.26            | EMT   | 11   | B/474/15   | T    | 0.3             | 0.3             | DP    |
|                                       |            | O    | 0.3             | 0.3             | DP    |      |            | O    | 0.33            | 0.26            | DP    |
| 2                                     | B/548/10   | T    | 0               | 0.8             | EMT   | 12   | B/1937/15  | T    | 0.74            | 0.59            | DP    |
|                                       |            | O    | 0.2             | 0.83            | EMT   |      |            | O    | 0.63            | 0.46            | DP    |
| 3                                     | B/580/10   | T    | 0.22            | 0               | CCM   | 13   | B/2972/15  | T    | 0.17            | 0.3             | DP    |
|                                       |            | O    | 0               | 0.52            | EMT   |      |            | O    | 0               | 0               | DP    |
| 4                                     | B/320/12   | T    | 0.65            | 0.19            | CCM   | 14   | B/2987/15  | T    | 0               | 0.26            | EMT   |
|                                       |            | O    | 0.22            | 0.26            | DP    |      |            | O    | 0               | 0.26            | EMT   |
| 5                                     | B/1029/12  | T    | 0.46            | 0.26            | CCM   | 15   | MB/195/12  | T    | 0               | 0.26            | EMT   |
|                                       |            | O    | 0.72            | 0.52            | CCM   |      |            | O    | 0               | 0.26            | EMT   |
| 6                                     | B/3392/12  | T    | 0.39            | 0.26            | DP    | 16   | 1511/14    | T    | 0.52            | 0.22            | CCM   |
|                                       |            | O    | 0.44            | 0.44            | DP    |      |            | O    | 0               | 0.26            | EMT   |

| 7                                  | B/8/13         | T    | 0.26            | 0.3             | DP    | 17                                     | 1866/13       | T    | 0               | 0.26            | CCM   |
|------------------------------------|----------------|------|-----------------|-----------------|-------|----------------------------------------|---------------|------|-----------------|-----------------|-------|
|                                    |                | O    | 0.3             | 0.3             | DP    |                                        |               | O    | 0.2             | 0.26            | DP    |
| 8                                  | B/343/13       | T    | 0.35            | 0.39            | DP    | <b>Ovary-Fallopian Tube tumor pair</b> |               |      |                 |                 |       |
|                                    |                | O    | 0.3             | 0.19            | DP    | 1                                      | B/1232/13     | T    | 0.19            | 0.26            | DP    |
| 9                                  | B/4/14         | T    | 0               | 0.3             | EMT   |                                        |               | F    | 0.26            | 0.26            | DP    |
|                                    |                | O    | 0               | 0.19            | DP    | <b>Ovary tumor with Ascites</b>        |               |      |                 |                 |       |
| 10                                 | B/991/14       | T    | 0               | 0.26            | EMT   | 1                                      | HT/14/453     | T    | 0.56            | 0.3             | CCM   |
|                                    |                | O    | 0.46            | 0.26            | DP    |                                        | HT/14/153     | C    | 0.76            | 0.26            | CCM   |
| <b>Unpaired Ovarian tumors</b>     |                |      |                 |                 |       |                                        |               |      |                 |                 |       |
| Case                               | Tissue ID      |      | CI <sub>E</sub> | CI <sub>M</sub> | Class | Case                                   | Tissue ID     |      | CI <sub>E</sub> | CI <sub>M</sub> | Class |
| 1                                  | B/1561/12      |      | 0.22            | 0.22            | DP    | 13                                     | HT/12/34-A7   |      | 0.46            | 0.13            | CCM   |
| 2                                  | B/914/14       |      | 0               | 0               | DN    |                                        | HT/12/34-A8   |      | 0.35            | 0.26            | DP    |
| 3                                  | B/1278/14      |      | 0.85            | 0.2             | CCM   | 14                                     | HT/13/2445    |      | 0               | 0.3             | EMT   |
| 4                                  | B/1582/15      |      | 0.78            | 0.46            | CCM   | 15                                     | HT/12/3871    |      | 0.57            | 0.46            | DP    |
| 5                                  | B/1481/12      |      | 0.54            | 0.26            | CCM   | 16                                     | 1205/14       |      | 0               | 0.2             | DN    |
| 6                                  | OT-20          |      | 0               | 0               | DN    | 17                                     | 1551/14       |      | 0.63            | 0.2             | CCM   |
| 7                                  | OT-25          |      | 0               | 0.3             | EMT   | 18                                     | 1268/15       |      | 0.46            | 0.3             | DP    |
| 8                                  | OT-28          |      | 0               | 0.22            | EMT   | <b>CT omental tumor</b>                |               |      |                 |                 |       |
| 9                                  | OT-31          |      | 0               | 0.3             | EMT   | 1                                      | 1217/14       |      | 0.26            | 0.46            | EMT   |
| 10                                 | HT/13/5184-B7  |      | 0.81            | 0.3             | CCM   | <b>CT ascites cell block</b>           |               |      |                 |                 |       |
|                                    | HT/13/5184-A31 |      | 0.19            | 0.44            | EMT   | 1                                      | CT/11/8       |      | 0.5             | 0.26            | CCM   |
| 11                                 | HT/12/1694-A16 |      | 0.5             | 0               | CCM   | 2                                      | CT/12/1510    |      | 0.76            | 0.26            | CCM   |
|                                    | HT/12/1694-A11 |      | 0.83            | 0.3             | CCM   | 3                                      | CT/12/1004    |      | 0.43            | 0               | CCM   |
| 12                                 | HT/12/1491     |      | 0.22            | 0               | CCM   |                                        |               |      |                 |                 |       |
| <b>Ovarian-Omentum tumor pairs</b> |                |      |                 |                 |       |                                        |               |      |                 |                 |       |
| Case                               | Tissue ID      | Site | CI <sub>E</sub> | CI <sub>M</sub> | Class | Case                                   | Tissue ID     | Site | CI <sub>E</sub> | CI <sub>M</sub> | Class |
| 1                                  | B/826/09       | T    | 0.56            | 0               | CCM   | 12                                     | 1968/14       | T    | 0.72            | 0.19            | CCM   |
|                                    | B/827/09       | O    | 0.56            | 0               | CCM   |                                        |               | O    | 0.65            | 0.3             | CCM   |
| 2                                  | B/272/11       | T    | 0               | 0.26            | DN    | 13                                     | 1715/14       | T    | 0.63            | 0.26            | CCM   |
|                                    |                | O    | 0.3             | 0.3             | DP    |                                        |               | O    | 0.59            | 0.26            | CCM   |
| 3                                  | B/2653/12      | T    | 0.72            | 0.72            | DP    | 14                                     | 417/13        | T    | 0.17            | 0.3             | DP    |
|                                    |                | O    | 0.48            | 0.3             | DP    |                                        |               | O    | 0               | 0.26            | EMT   |
| 4                                  | B/2716/13      | T    | 0.48            | 0.26            | CCM   | 15                                     | HT/13/4439    | T    | 0.43            | 0.22            | CCM   |
|                                    |                | O    | 0.37            | 0.26            | DP    |                                        | HT/13/4488    | O    | 0.8             | 0.43            | EMT   |
| 5                                  | B/1076/14      | T    | 0.69            | 0.65            | DP    | 16                                     | HT/14/0914-O3 | T    | 0.61            | 0.26            | CCM   |
|                                    |                | O    | 0.22            | 0.72            | EMT   |                                        | HT/14/914-K   | O    | 0.72            | 0.56            | DP    |
| 6                                  | B/550/15       | T    | 0.52            | 0.3             | CCM   | <b>Ovarian tumor with ascites</b>      |               |      |                 |                 |       |
|                                    |                | O    | 0.52            | 0.3             | CCM   | 1                                      | HT/13/5065    | T    | 0               | 0.46            | EMT   |
| 7                                  | MB/952/10      | T    | 0.5             | 0.26            | DP    |                                        | HT/13/3832    | T    | 0.5             | 0.3             | CCM   |
|                                    |                | O    | 0.19            | 0.3             | DP    |                                        | CT/13/1614    | C    | 0               | 0               | DN    |
| 8                                  | MB/443/11      | T    | 0               | 0.26            | EMT   | 2                                      | HT/12/223-A23 | C    | 0.19            | 0.43            | EMT   |
|                                    |                | O    | 0.39            | 0.46            | DP    |                                        | CT/12/78      | T    | 0.19            | 0.43            | EMT   |
| 9                                  | MB/591/11      | T    | 0               | 0.3             | EMT   | <b>Ovarian-Fallopian tube tumors</b>   |               |      |                 |                 |       |

|    |           |   |      |      |     |                                           |               |   |      |      |     |
|----|-----------|---|------|------|-----|-------------------------------------------|---------------|---|------|------|-----|
|    |           | O | 0.17 | 0.3  | DP  | 1                                         | B/3248/13     | T | 0    | 0.26 | EMT |
| 10 | MB/823/11 | T | 0.26 | 0.3  | DP  |                                           |               | F | 0.74 | 0.31 | DN  |
|    |           | O | 0.26 | 0.26 | DP  | <b>Fallopian Tube tumors with ascites</b> |               |   |      |      |     |
| 11 | 1444/14   | T | 0.69 | 0.46 | CCM | 1                                         | HT/13/3418-A5 | F | 0.22 | 0    | DN  |
|    |           | O | 0    | 0.3  | EMT |                                           | CT/13/1087    | C | 0    | 0    | DN  |

Ovarian Tumor (T); Omental Tumor (O)  
Cell block (C); Fallopian tube tumor (F)

**Supplementary Table S5. CI scores for chemo-naïve and chemo-treated pair cases (n = 6)**

| Case | Tissue ID       | Treatment | CI <sub>E</sub> | CI <sub>M</sub> | Class |
|------|-----------------|-----------|-----------------|-----------------|-------|
| 1    | HT/13/1273      | Pre -     | 0.5             | 0               | CCM   |
|      | HT/13/2561-A10  | Post -    | 0.46            | 0               | CCM   |
| 2    | HT/14/2         | Pre -     | 0.93            | 0.28            | CCM   |
|      | HT/14/001890-B9 | Post -    | 0.59            | 0.3             | CCM   |
|      | CT/14/591       | Post -    | 0.8             | 0               | CCM   |
|      | HT/14/1890-B12  | Post -    | 0.59            | 0.22            | CCM   |
| 3    | HT/13/2610      | Pre -     | 0.17            | 0.22            | DP    |
|      | HT/13/004447-A1 | Post -    | 0.52            | 0.3             | CCM   |
| 4    | CT/12/1099      | Pre -     | 0.39            | 0.2             | CCM   |
|      | HT/12/2879-B2   | Post -    | 0.48            | 0.2             | CCM   |
|      | HT/12/2879-A10  | Post      | 0.17            | 0.17            | DN    |
| 5    | CT/13/1081      | Pre -     | 0.72            | 0.3             | CCM   |
|      | HT/12/3173-A4   | Post -    | 0.17            | 0               | DN    |
|      | HT/12/3173-B2   | Post      | 0.43            | 0.3             | DP    |
|      | CT/12/1236      | Post      | 0               | 0.22            | EMT   |
| 6    | HT/13/1296      | Pre -     | 0.17            | 0.26            | DP    |
|      | CT/12/401       | Pre -     | 0.35            | 0               | CCM   |
|      | HT/13/2513-A16  | Post      | 0.39            | 0               | CCM   |
|      | HT/13/2513-A20  | Post -    | 0.22            | 0               | CCM   |
|      | CT/13/763       | Post -    | 0.48            | 0               | CCM   |

**Supplementary Table S6. Class comparison of tumors of ovary, fallopian tube, omentum and ascites cell block**

|                                                                                 | Ovarian tumors |         | Fallopian tube tumors* |         | Omental tumors* |         | Ascites cell block* |         |
|---------------------------------------------------------------------------------|----------------|---------|------------------------|---------|-----------------|---------|---------------------|---------|
|                                                                                 | Naïve          | Treated | Naïve                  | Treated | Naïve           | Treated | Naïve               | Treated |
| Class                                                                           | n=50           | n=52    | n=7                    | n=2     | n=26            | n=17    | n=4                 | n=9     |
| CCM                                                                             | 15             | 25      | 2                      | 1       | 5               | 4       | 3                   | 5       |
| EMT                                                                             | 15             | 12      | 1                      | 0       | 5               | 5       | 0                   | 2       |
| DN                                                                              | 4              | 5       | 0                      | 0       | 2               | 0       | 0                   | 2       |
| DP                                                                              | 17             | 10      | 5                      | 1       | 15              | 8       | 1                   | 0       |
| Class Comparison CCM vs. EMT+DN+DP in ovarian tumors upon chemo-treatment       |                |         |                        |         |                 |         |                     |         |
| Chi square =                                                                    | 3.58           |         |                        |         |                 |         |                     |         |
| p value =                                                                       | 0.05           |         |                        |         |                 |         |                     |         |
| Class Comparison CCM vs. EMT+DN+DP in combined tumor sites upon chemo-treatment |                |         |                        |         |                 |         |                     |         |
| Chi square =                                                                    | 22.88          |         |                        |         |                 |         |                     |         |
| p value =                                                                       | 1.72E-06       |         |                        |         |                 |         |                     |         |

\* Class comparison is not applicable as sample size is less than 50

# Supplementary Figs

## Fig. S1

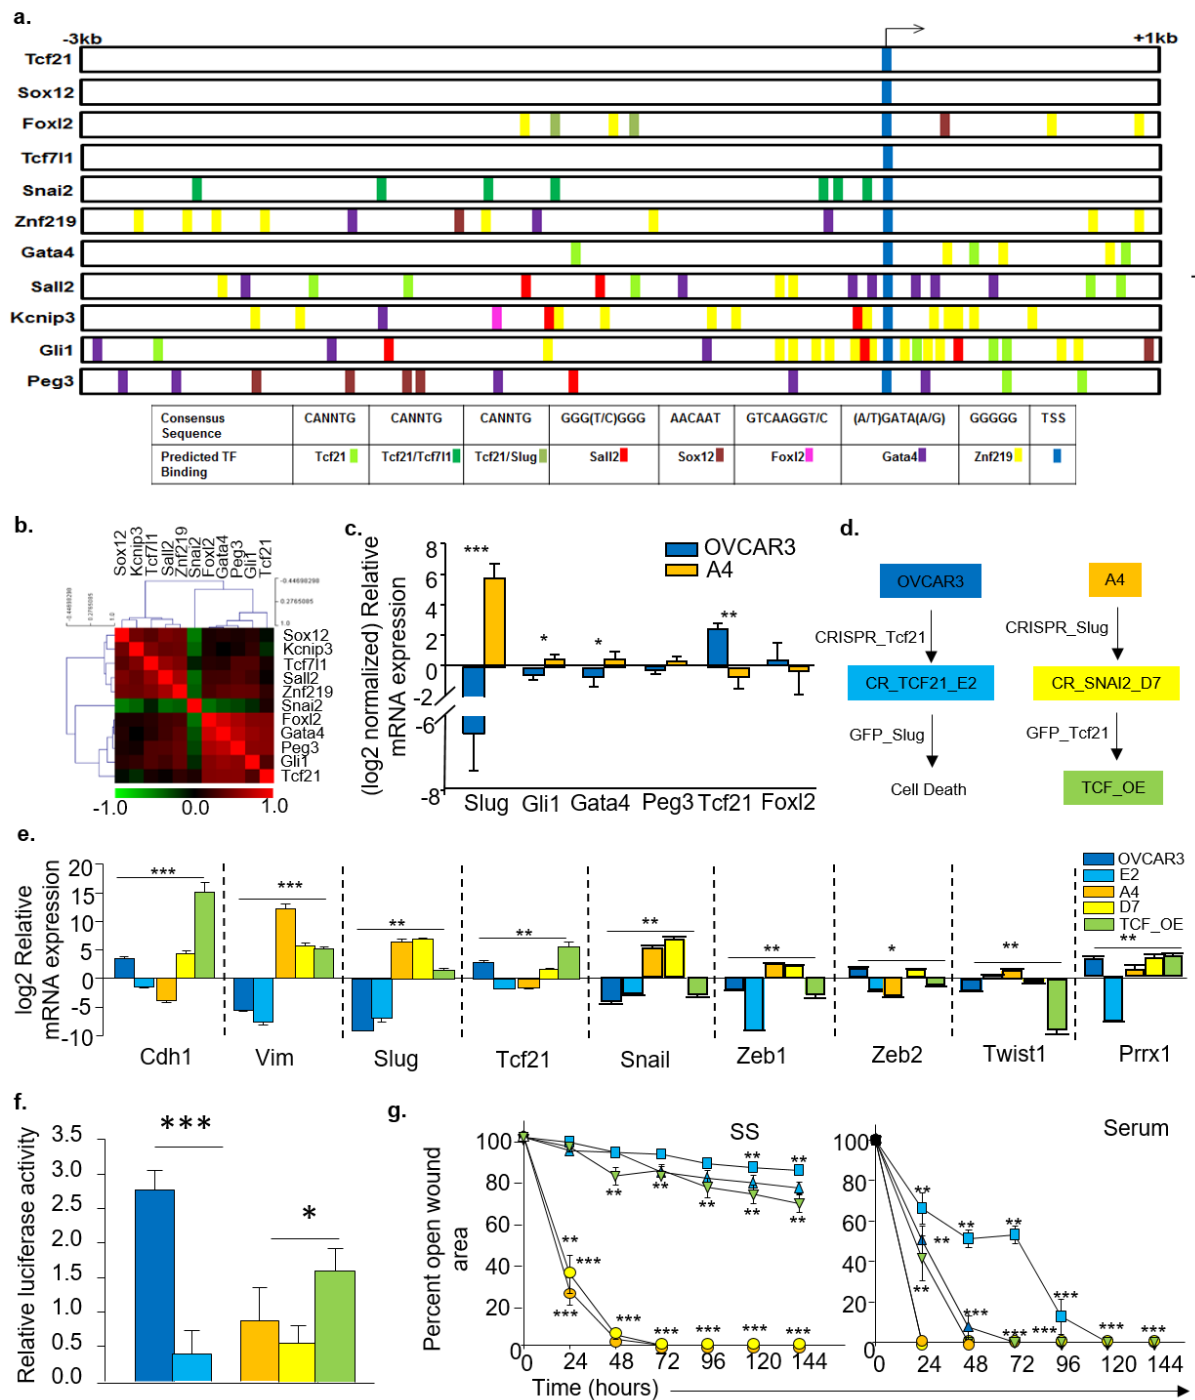

**Fig.S1. Tcf21 and Slug expression govern cellular phenotypes in HGSC. a.** Schematic promoter maps of TFs identified from differentially expressed modules in Class 1 and Class 2. Positions of Transcription Factor Binding Sites depicted based on consensus sequences for each TF; **b.** TF Correlation plot based on expression of *Sox12*, *Kcnip3*, *Tcf711*, *Sall2*, *Znf219*, *Snai2* (Slug), *Foxl2*, *Gata4*, *Peg3*, *Gli1*, *Tcf21* in the TCGA-HGSC data; **c.** Expression profiles of *Tcf21*, *Snai2*, *Gli1*, *Foxl2*, *Gata4* and *Peg3* in OVCAR3 and A4 cells (Class 1 and Class 2 respectively) as determined by qPCR, data normalized with Gapdh expression; **d.** Flowchart depicting stepwise generation of knockout and over-expression clones of Tcf21 and Slug in OVCAR3 and A4 cells respectively. Color scheme depicts each of the cell lines in following

**Figs; e. Expression profiles of phenotypic markers (*Cdh1*, *Vim*) and TFs (*Snai2*-Slug, *Tcf21*, *Snail*, *Zeb1*, *Zeb2*, *Twist1*, *Prrx1*) in *Tcf21* (E2, TCF\_OE) and *Slug* (D7) clones derived from OVCAR3 and A4 cells respectively, normalization with GAPDH; f. Reporter assays to determine the E-cadherin promoter activity in derivative clones and parental cells, luciferase activity normalized to native luciferase vector: pGL3; g. Graphical representation of wound healing efficiency of parental and derivative cells, in the absence and presence of serum (upper and lower panels respectively); All data are representative of experiments performed in triplicate and are depicted as mean  $\pm$  SEM. \* $p < 0.05$ , \*\* $p < 0.01$ , \*\*\* $p < 0.001$ .**

**Fig. S2**

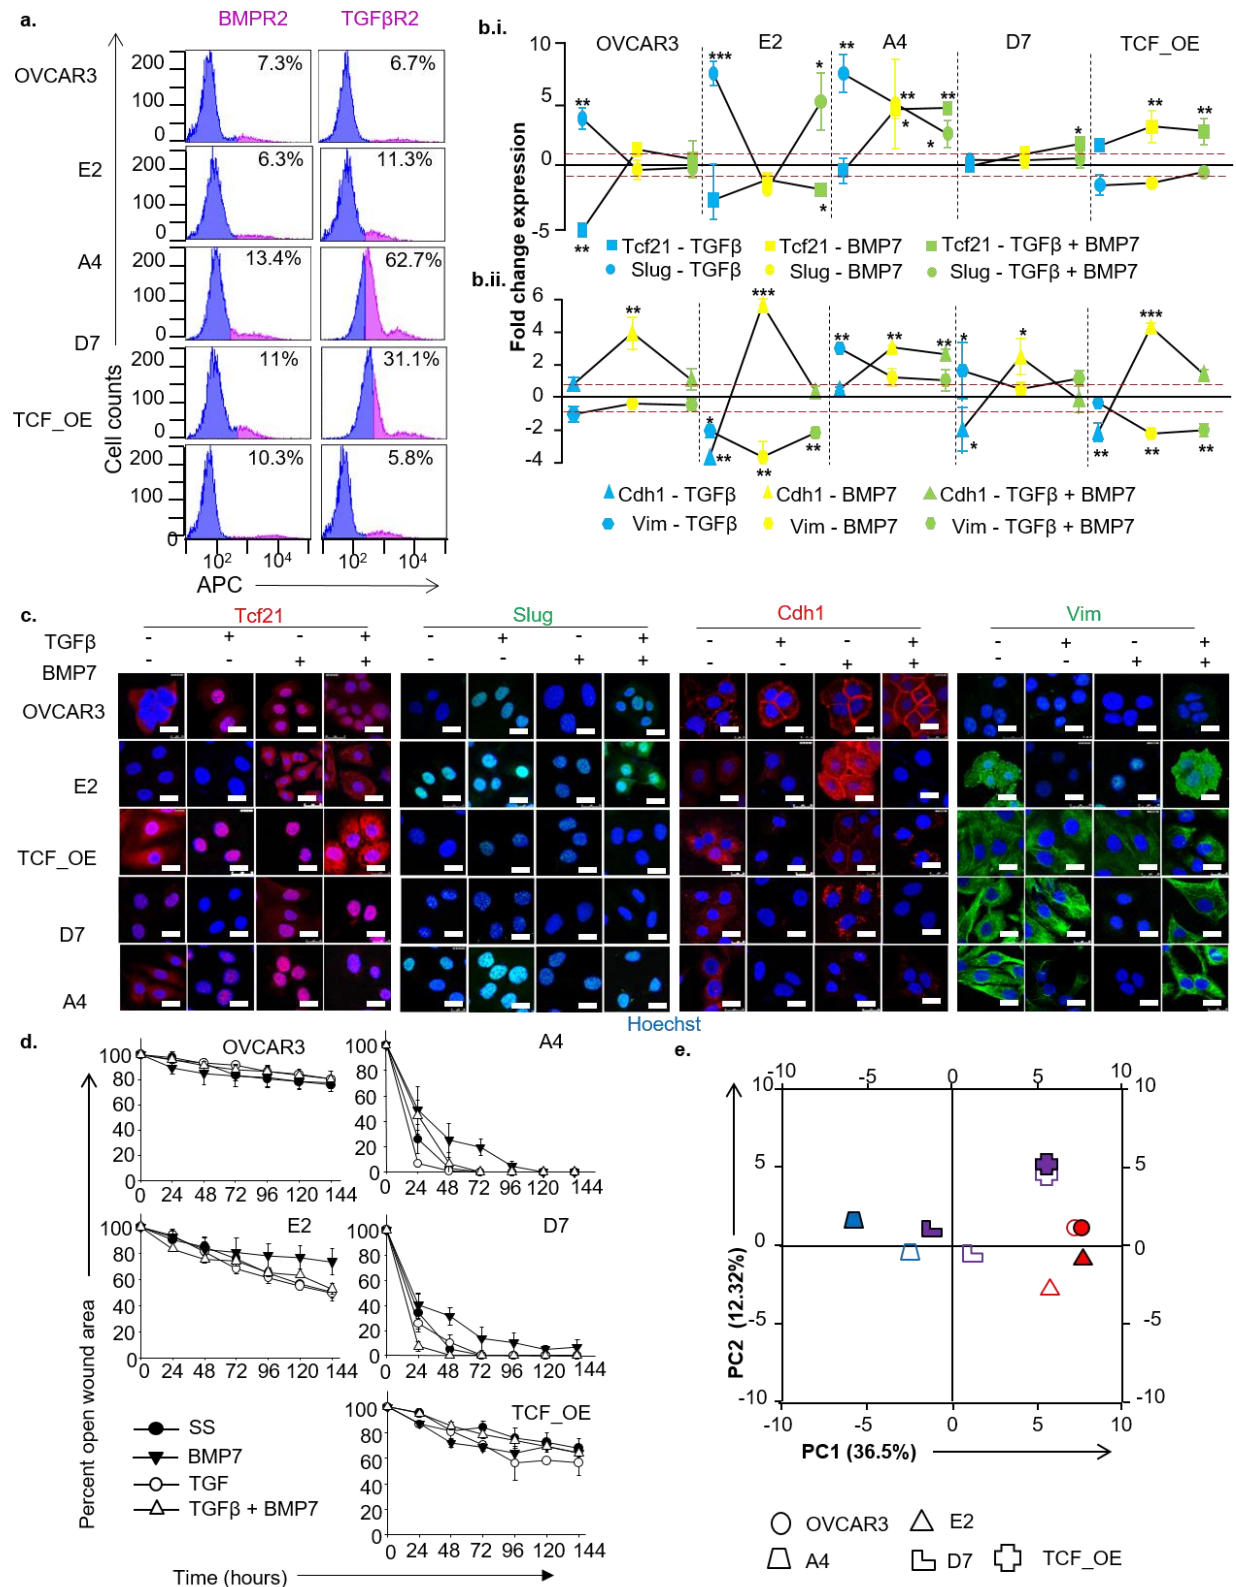

**Fig.S2. Responses of parental and derivative cells following treatment with TGFβ and/or BMP7. a. Representative histograms of frequencies of TGFβR2 and BMPR2 expression as determined by flow cytometry; b. Fold change in mRNA expression profiles for (i) TFs (upper panel) and (ii) phenotypic markers (lower panel), normalization with GAPDH, serum starved cells considered as controls; c. Representative immunostaining for Tcf21, Slug, Cdh1 and Vim; d.**

Graphical representation of wound healing efficiency; e. PC analysis of time-lapse imaging based migration data in cell lines and derivatives following TGF $\beta$  treatment. PC1, PC2 and color gradient denoted as per Fig.1e. Filled shapes indicate wound healing response to TGF $\beta$ ; empty shapes indicate serum starved cells. All data are representative of experiments performed in triplicate and are depicted as mean  $\pm$  SEM. \*p<0.05, \*\*p<0.01, \*\*\*p<0.001.

**Fig. S3**

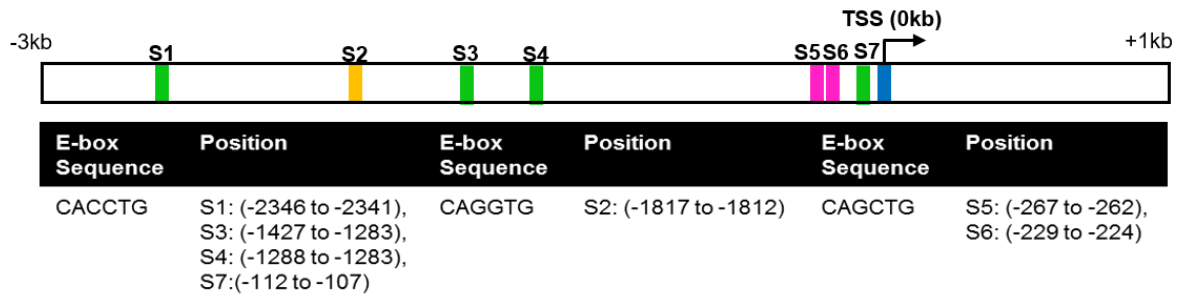

**Fig.S3.** Schematic representation of Slug promoter region depicting the location and sequences of E-boxes. Promoter region: -3kb to +1kb from transcription start site (TSS).



**Fig.S4**

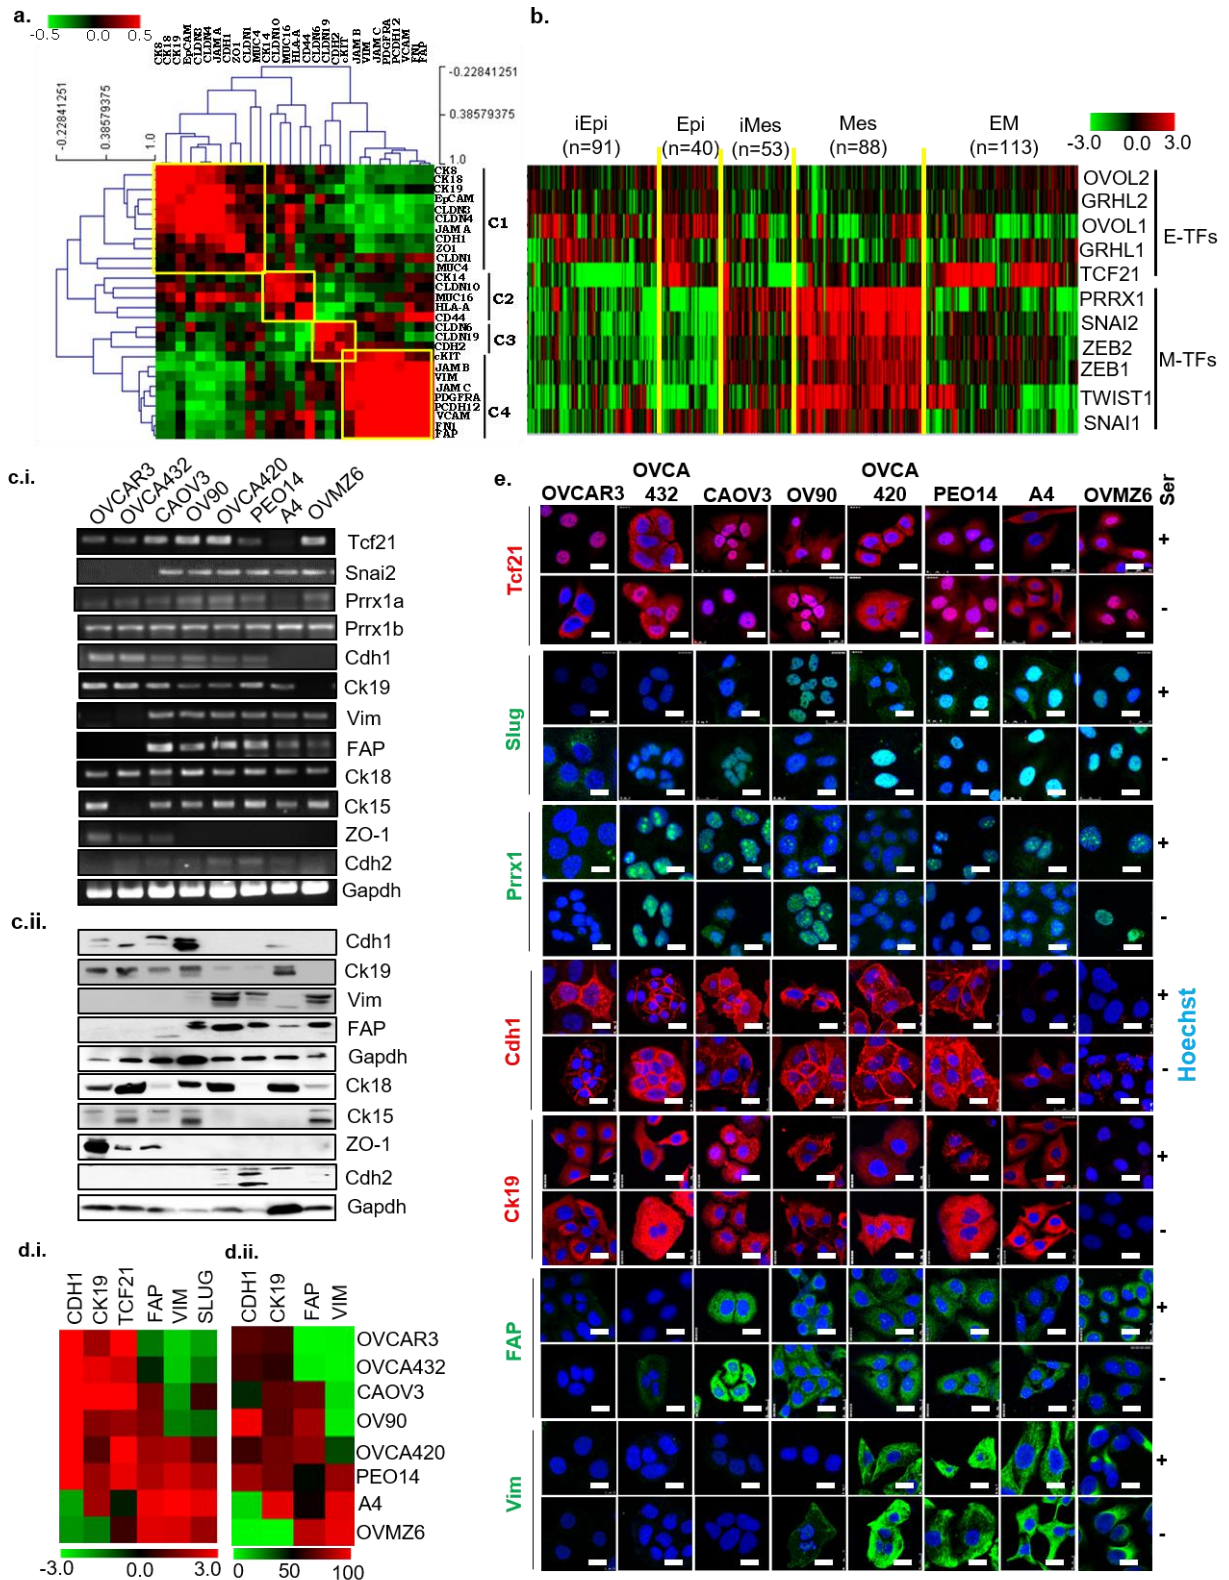

**Fig.S4. Functional correlates of the five discrete phenotypes in the HGSC cell line panel. a. Correlation heat-map of epithelial and mesenchymal markers in the TCGA-HGSC gene expression dataset; b. Heat-map segregating HGSC samples into phenotypic states based on expression of epithelial and mesenchymal phenotype associated TFs; c. Expression profiles of markers across a panel of HGSC cell lines as determined by qPCR (i) and immunoblotting**

(ii);GAPDH used as endogenous control. d. Heat-maps of E (Tcf21, E-cadherin: Cdh1, Cytokeratin19: CK19) and M (Slug, Fibroblast Activation Protein: FAP, Vimentin: Vim) markers depicting (i) expression profiles normalized to GAPDH and (ii) percentage positive population as profiled by flow cytometry; e. Immunostaining for E and M markers in HGSC cell lines in the presence and absence of serum. Nuclei visualized with Hoechst, Scale bar 20 $\mu$ . All data are representative of experiments performed in triplicate and are depicted as mean + SEM, \* $p < 0.05$ , \*\* $p < 0.01$ , \*\*\* $p < 0.001$ .

**Fig.S5**

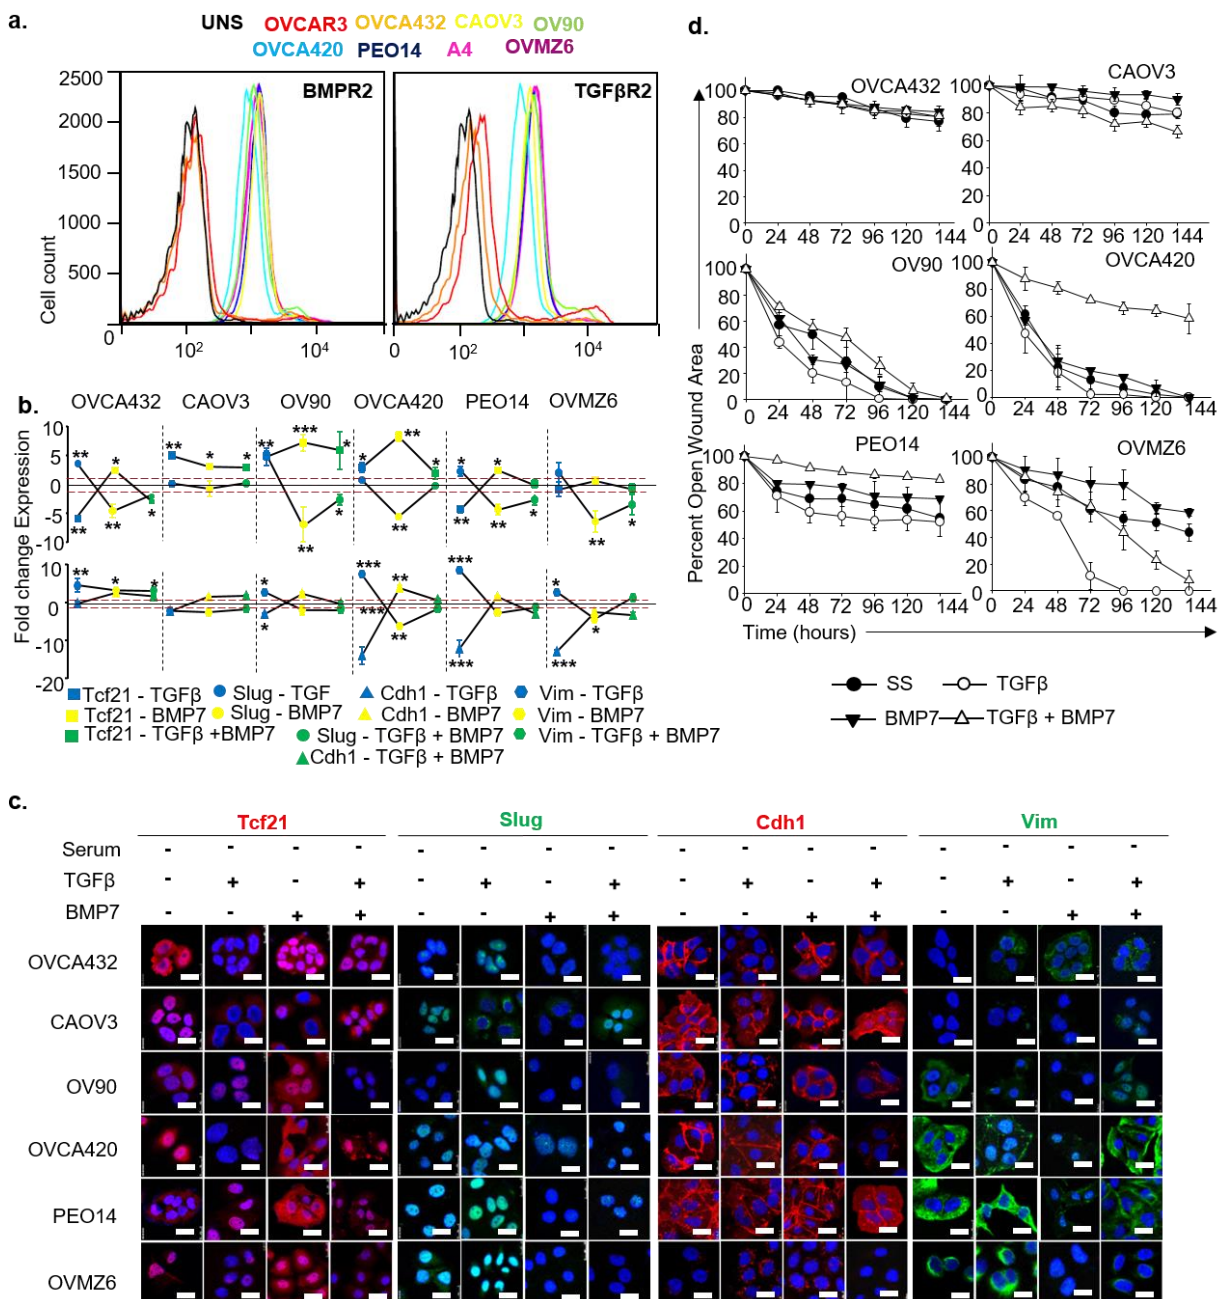

**Fig.S5. Differential responsiveness of cell lines to TGFβ and/or BMP7. a.** Histograms depicting percent positive TGFβR2 and Bmpr2 cell populations in HGSC cell line panel; **b.** Fold change in mRNA expression profiles, normalized with GAPDH for (i) TFs and (ii) phenotypic markers

following growth factor treatment as indicated, fold-change determined with respect to serum starved cells; c. Expression and localization of Tcf21 and Slug and phenotypic markers, serum starved cells used as a control, nuclei visualized with Hoechst, scale bars, 20µm; d. Graphical representation of wound healing efficiency of HGSC cell lines and TF-derivative clones following growth factor treatment as indicated; all data are representative of experiments performed in triplicate and are depicted as mean  $\pm$  SEM. \*p<0.05, \*\*p<0.01, \*\*\*p<0.001.

**Fig.S6**

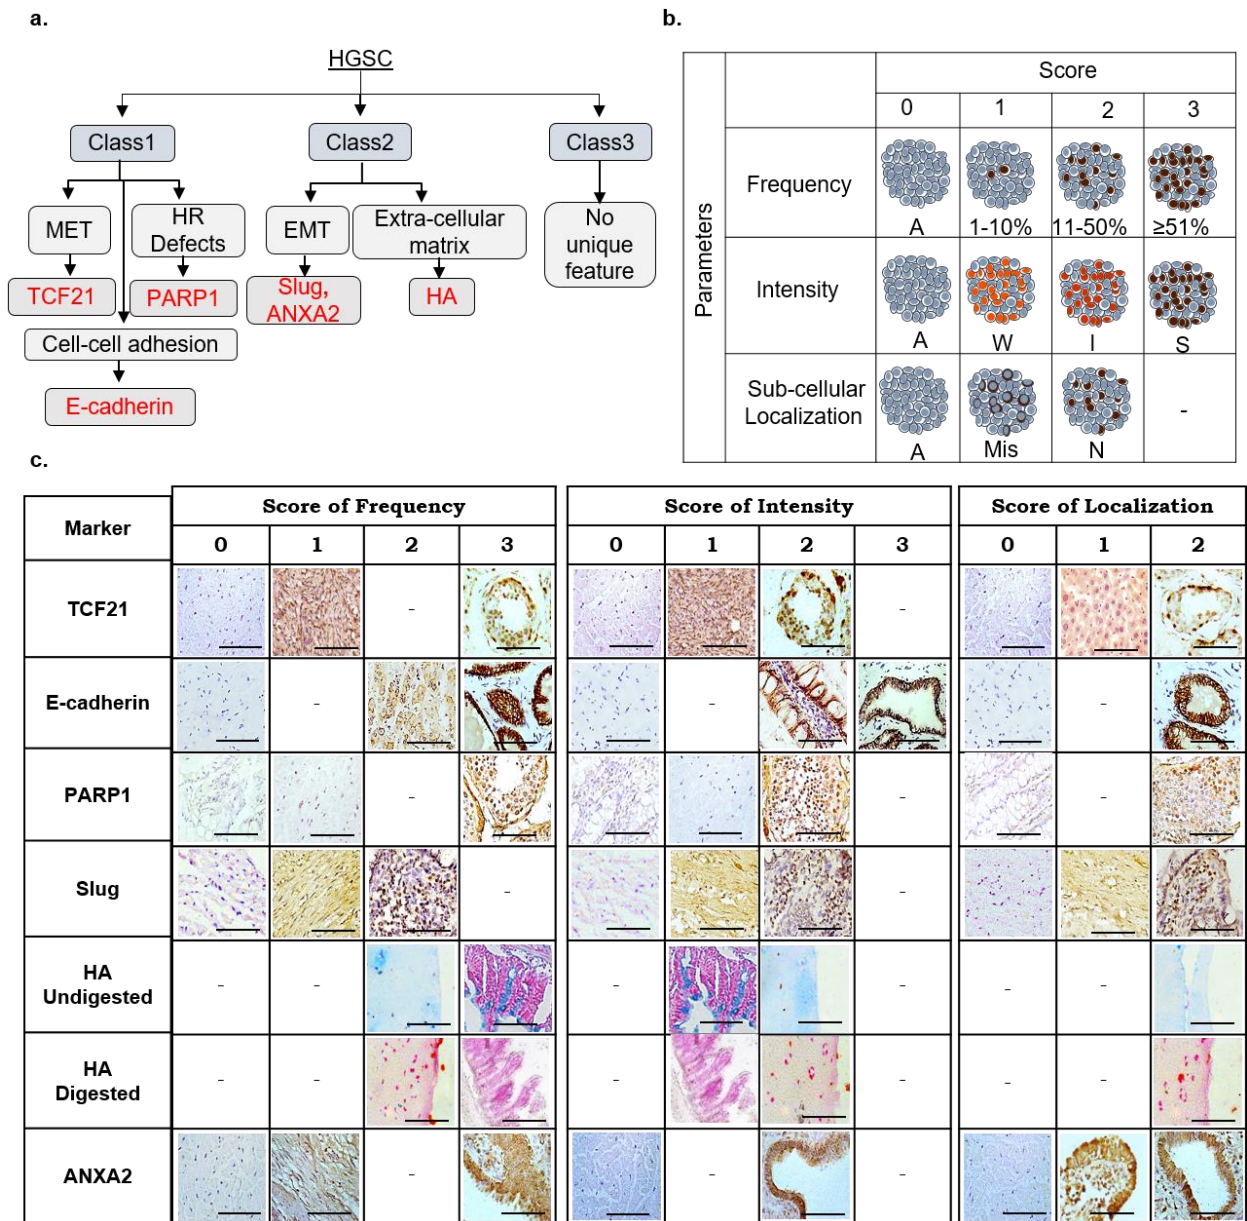

**Fig. S6. Scoring of immunohistochemically and histochemically stained FFPE sections. a.** Rationale for class-specific biological function based putative marker selection, MET: Mesenchymal-to-epithelial transition, HR: Homologous Recombination mediated DNA Damage Repair, EMT: Epithelial-to-mesenchymal transition; **b.** Schematic of scoring guidelines for IHC based staining of nuclear markers (TCF21, PARP1, Slug), A: Absent, W: Weak, I: Intermediate, S: Strong, Mis: Mislocalised, N: normal localization. A similar approach was used for scoring of membrane markers (E-cadherin, ANXA2) except that sub-cellular location was scored either 1 (cytoplasm) or 2 (cell membrane), while extracellular expression of hyaluronan fibers (evaluated as blue color developed by Alcian blue staining that is lost on hyaluronidase) was scored 1 in distant tumor stroma, and 2 in tumor epithelial cell nests. **c.** Visual scoring of FFPE sections using an antibody against TCF21, E-cadherin, PARP1, Slug, ANXA2 and

histochemically stained HA in normal human tissues. The marker staining intensities were evaluated by visual scoring for frequency, intensity and localization. TCF21:  $S_{\text{Freq}}$  – Score 0 (cardiac myocytes), 1 (stromal cells of ovary), 3 (germinal basal cells of testis);  $S_{\text{Int}}$  – Score 0 (cardiac myocytes), 1 (stromal cells of ovary), 2 (germinal basal cells of testis);  $S_{\text{Loc}}$  – Score 0 (cardiac myocytes), 1 (hepatocytes of liver), 2 (germinal basal cells of testis). E-cadherin:  $S_{\text{Freq}}$  – Score 0 (cardiac myocytes), 2 (liver hepatocytes), 3 (epithelial cells of prostate);  $S_{\text{Int}}$  – Score 0 (cardiac myocytes), 2 (epithelial cells of small intestine), 3 (epithelial cells of prostate);  $S_{\text{Loc}}$  – Score 0 (cardiac myocytes) and 2 (epithelial cells of prostate). PARP1:  $S_{\text{Freq}}$  – Score 0 (mucosa of small intestine), 1 (cardiac myocytes), 3 (germinal basal cells of testis);  $S_{\text{Int}}$  – Score 0 (mucosa of small intestine), 1 (cardiac myocytes), 2 (germinal basal cells of testis); and  $S_{\text{Loc}}$  – Score 0 (mucosa of small intestine), 2 (germinal basal cells of testis). Slug:  $S_{\text{Freq}}$  – Score 0 (cardiac myocytes), 1 (smooth muscle of appendix), 2 (lymphocytes of small intestine);  $S_{\text{Int}}$  – Score 0 (cardiac myocytes), 1 (smooth muscle of appendix), 2 (lymphocytes of small intestine); and  $S_{\text{Loc}}$  – Score 0 (cardiac myocytes), 1 (somatic muscles of appendix), 2 (lymphocytes of small intestine). HA:  $S_{\text{Freq}}$  – Score 2 (cartilage), 3 (sub-mucosa of small intestine);  $S_{\text{Int}}$  – Score 1 (sub-mucosa of small intestine), 2 (cartilage); and  $S_{\text{Loc}}$  – Score 2 (cartilage). ANXA2:  $S_{\text{Freq}}$  – Score 0 (cardiac myocytes), 1 (somatic muscle of small intestine), 3 (epithelial cells of gall bladder);  $S_{\text{Int}}$  – Score 0 (cardiac myocytes), 2 (epithelial cells of gall bladder); and  $S_{\text{Loc}}$  – Score 0 (cardiac myocytes), 1 (stromal cells of gall bladder), 2 (epithelial cells of gall bladder). Scale bar, 100 $\mu\text{m}$ .

### Supplementary Movies

1. Live cell imaging of *in vitro* wound healing assay for parental and derivative cell lines in the absence of serum. Mitomycin 'C' added as proliferation inhibitor.
2. Live cell imaging for parental and derivative cell lines in the presence of serum.
3. Live cell imaging for parental and derivative cell lines in the presence of TGF $\beta$ . Mitomycin 'C' added as a proliferation inhibitor
4. Live cell imaging for HGSC cell lines in the absence of serum. Mitomycin 'C' added as a proliferation inhibitor.
5. Live cell imaging for HGSC cell lines in the presence of serum
6. Live cell imaging for HGSC cell lines following 0.1% DMSO treatment in the absence of serum. Mitomycin 'C' added as a proliferation inhibitor.
7. Live cell imaging for HGSC cell lines following Paclitaxel treatment in the absence of serum. Mitomycin 'C' added as a proliferation inhibitor.

**Supplementary Table 7. Patient Samples: Clinical information of chemo-naïve (CN) and chemo-treated (CT) tumors collected from multiple centers**

| <b>Chemo-naïve (CN) ovarian tumor</b>                                   |                  |                  |             |              |              |                  |                  |             |              |
|-------------------------------------------------------------------------|------------------|------------------|-------------|--------------|--------------|------------------|------------------|-------------|--------------|
| <b>Cas e</b>                                                            | <b>Tissue ID</b> | <b>Age (Yrs)</b> | <b>Se x</b> | <b>Stage</b> | <b>Cas e</b> | <b>Tissue ID</b> | <b>Age (Yrs)</b> | <b>Se x</b> | <b>Stage</b> |
| 1                                                                       | B/1102/08        | 51               | F           | NA           | 12           | B/1294/11        | 65               | F           | pT1aNx       |
| 2                                                                       | B/2217/08        | 58               | F           | NA           | 13           | B/1920/11        | 40               | F           | NA           |
| 3                                                                       | B/2263/08        | 55               | F           | T1cN0Mx      | 14           | B/1338/13        | 68               | F           | pT1cNx       |
| 4                                                                       | B/2293/08        | 50               | F           | TxNxMx       | 15           | B/3091/13        | 42               | F           | NA           |
| 5                                                                       | B/2281/09        | 56               | F           | pT3NxMx      | 16           | B/1781/14        | 55               | F           | T1cNxMx      |
| 6                                                                       | B/3522/09        | 59               | F           | pT1c         | 17           | B/1519/2015      | 63               | F           | T1           |
| 7                                                                       | B/22/10          | 48               | F           | NA           | 18           | B/2381/15        | 63               | F           | IIIc         |
| 8                                                                       | B/211/10         | 57               | F           | pT2bNxMx     | 19           | B/2283/08        | 64               | F           | T3aN0Mx      |
| 9                                                                       | B/799/10         | 46               | F           | NA           | 20           | HT/11/143        | 61               | F           | NA           |
| 10                                                                      | B/804/10         | 46               | F           | pT3bNx       | 21           | HT/12/1743       | 45               | F           | pT3bN0Mx     |
| 11                                                                      | B/906/10         | 41               | F           | T1XCNO Mx    | 22           | 361/13           | 45               | F           | NA           |
| <b>CN omental tumor</b>                                                 |                  |                  |             |              |              |                  |                  |             |              |
| 1                                                                       | HT/13/001471     | 74               | F           | NA           | 2            | HT/13/004397     | 70               | F           | NA           |
| <b>CN ovarian tumor with metastases in omentum</b>                      |                  |                  |             |              |              |                  |                  |             |              |
| 1                                                                       | B/2981/09        | 56               | F           | NA           | 10           | B/991/14         | 42               | F           | T2cN0Mx      |
| 2                                                                       | B/548/10         | 22               | F           | pT3bNx       | 11           | B/474/15         | 51               | F           | pT3cN1Mx     |
| 3                                                                       | B/580/10         | 52               | F           | T3cN1Mx      | 12           | B/1937/15        | 56               | F           | pT3c         |
| 4                                                                       | B/320/12         | 54               | F           | pT3cN0       | 13           | B/2972/15        | 63               | F           | NA           |
| 5                                                                       | B/1029/12        | 72               | F           | pT3cNx       | 14           | B/2987/15        | 50               | F           | pT3a (III)   |
| 6                                                                       | B/3392/12        | 55               | F           | T3aN0        | 15           | MB/195/12        | 51               | F           | NA           |
| 7                                                                       | B/8/13           | 74               | F           | pT3cNx       | 16           | 1511/14          | 38               | F           | NA           |
| 8                                                                       | B/343/13         | 40               | F           | pT3bpN0      | 17           | 1866/13          | 60               | F           | NA           |
| 9                                                                       | B/4/14           | 54               | F           | NA           |              |                  |                  |             |              |
| <b>CN ovarian tumor with ascites</b>                                    |                  |                  |             |              |              |                  |                  |             |              |
| 1                                                                       | HT/14/453        | 73               | F           | NA           |              |                  |                  |             |              |
| <b>CN Ovarian tumors with Fallopian Tube tumors</b>                     |                  |                  |             |              |              |                  |                  |             |              |
| 1                                                                       | B/1232/13        | 52               | F           | T3aN0        |              |                  |                  |             |              |
| <b>CN tumors collected from Ovary, Fallopian Tube and Omental sites</b> |                  |                  |             |              |              |                  |                  |             |              |
| 1                                                                       | B/1716/09        | 50               | F           | pT3aN1Mx     | 4            | B/2774/12        | 55               | F           | pT3cN0M0     |
| 2                                                                       | B/3136/09        | 43               | F           | pT3bN0Mx     | 5            | B/749/13         | 55               | F           | pT3cNx       |
| 3                                                                       | B/825/10         | 50               | F           | pT3bNx       | 6            | B/1627/13        | 62               | F           | NA           |
| <b>Chemo-treated (CT) ovarian tumor</b>                                 |                  |                  |             |              |              |                  |                  |             |              |
| <b>Cas e</b>                                                            | <b>Tissue ID</b> | <b>Ag e (Y)</b>  | <b>Se x</b> | <b>Stage</b> | <b>Case</b>  | <b>Tissue ID</b> | <b>Ag e (Yr)</b> | <b>Sex</b>  | <b>Stage</b> |

|                                                     |                    | rs)    |   |           |    |                   | s) |   |               |
|-----------------------------------------------------|--------------------|--------|---|-----------|----|-------------------|----|---|---------------|
| 1                                                   | B/1561/12          | 40     | F | NA        | 10 | HT/13/51<br>84    | 40 | F | pT2aN1        |
| 2                                                   | B/914/14           | 54     | F | NA        | 11 | HT/12/16<br>94    | 40 | F | yPT3cN1       |
| 3                                                   | B/1278/14          | 69     | F | ypT3bNxMx | 12 | HT/12/34-<br>A7   | 61 | F | ypT2bN0<br>Mx |
| 4                                                   | B/1582/15          | 45     | F | ypT1bN0   | 13 | HT/12/14<br>91    | 42 | F | ypT2aN1<br>Mx |
| 5                                                   | B/1481/12          | 55     | F | T1cNx     | 14 | HT/13/24<br>45    | 61 | F | ypT3cN0       |
| 6                                                   | OT-20              | 45     | F | NA        | 15 | HT/12/38<br>71    | 62 | F | ypT3cN1       |
| 7                                                   | OT-25              | 61     | F | NA        | 16 | 1205/14           | 44 | F | ypT1bN1<br>Mx |
| 8                                                   | OT-28              | 50     | F | NA        | 17 | 1551/14           | 60 | F | NA            |
| 9                                                   | OT-31              | 55     | F | NA        | 18 | 1268/15           | 64 | F | pT1CN0<br>Mx  |
| <b>CT omental tumor</b>                             |                    |        |   |           |    |                   |    |   |               |
| 1                                                   | 1217/14            | 41     | F | ypT3N0Mx  |    |                   |    |   |               |
| <b>CT ascites cell block</b>                        |                    |        |   |           |    |                   |    |   |               |
| 1                                                   | CT/11/8            | 61     | F | NA        | 2  | CT/12/15<br>10    | 62 | F | NA            |
| <b>CT ovarian tumor with metastases in omentum</b>  |                    |        |   |           |    |                   |    |   |               |
| 1                                                   | B/826/09           | N<br>A | F | NA        | 9  | MB/591/1<br>1     | 70 | F | NA            |
| 2                                                   | B/272/11           | 56     | F | pT3aN0M0  | 10 | MB/823/1<br>1     | 58 | F | ypT3bNx<br>M1 |
| 3                                                   | B/2653/12          | 46     | F | pT3NxMx   | 11 | 1444/14           | 49 | F | NA            |
| 4                                                   | B/2716/13          | 39     | F | NA        | 12 | 1968/14           | 72 | F | NA            |
| 5                                                   | B/1076/14          | 74     | F | T1        | 13 | 1715/14           | 51 | F | NA            |
| 6                                                   | B/550/15           | N<br>A | F | yP2cNxMx  | 14 | 417/13            | 57 | F | NA            |
| 7                                                   | MB/952/10          | 60     | F | ypT3bN1   | 15 | HT/13/44<br>39    | 78 | F | NA            |
| 8                                                   | MB/443/11          | 37     | F | ypT3cN1Mx | 16 | HT/14/91<br>4     | 57 | F | ypT3bN1       |
| <b>CT ovarian tumor with ascites</b>                |                    |        |   |           |    |                   |    |   |               |
| 1                                                   | HT/13/5065-<br>A12 | 27     | F | ypT3bN1   | 2  | HT/12/22<br>3-A23 | 61 | F | NA            |
| <b>CT Ovarian tumors with Fallopian Tube tumors</b> |                    |        |   |           |    |                   |    |   |               |
| 1                                                   | B/3248/13          | 30     | F | T1        |    |                   |    |   |               |
| <b>CT Fallopian Tube tumors with ascites</b>        |                    |        |   |           |    |                   |    |   |               |
| 1                                                   | HT/13/3418-<br>A5  | 60     | F | NA        |    |                   |    |   |               |

Supplementary Table 8. Clinical information of chemo-naïve and chemo-treated tumors collected from same patient

| <b>CN-CT pair tumors</b> |           |     |     |       |         |      |
|--------------------------|-----------|-----|-----|-------|---------|------|
| Case                     | Tissue ID | Age | Sex | Stage | Therapy | Site |

|   |                | (Yrs) |   |         |     |   |
|---|----------------|-------|---|---------|-----|---|
| 1 | HT/13/1273     | 52    | F | NA      | No  | T |
|   | HT/13/2561-A10 | 52    | F | NA      | Yes | T |
| 2 | HT/14/2        | 70    | F | NA      | No  | O |
|   | HT/14/1890-B9  | 70    | F | ypT3cN1 | Yes | T |
|   | HT/14/1890-B12 | 70    | F | ypT3cN1 | Yes | T |
|   | CT/14/591      | 70    | F | NA      | Yes | C |
| 3 | HT/13/2610     | 64    | F | NA      | No  | T |
|   | HT/13/4447-A1  | 65    | F | ypT2cN0 | Yes | T |
| 4 | CT/12/1099     | 65    | F | NA      | No  | C |
|   | HT/12/2879-B2  | 65    | F | pT1cNx  | Yes | T |
|   | HT/12/2879-A10 | 65    | F | pT1cNx  | Yes | T |
| 5 | CT/13/1081     | 53    | F | NA      | No  | C |
|   | HT/12/3173-A4  | 54    | F | ypT3bN1 | Yes | T |
|   | HT/12/3173-B2  | 54    | F | ypT3bN1 | Yes | T |
|   | CT/12/1236     | 54    | F | ypT3bN1 | Yes | C |
| 6 | HT/13/1296     | 61    | F | NA      | No  | O |
|   | CT/12/401      | 61    | F | NA      | No  | C |
|   | HT/13/2513-A16 | 61    | F | ypT3aN0 | Yes | T |
|   | HT/13/2513-A20 | 61    | F | ypT3aN0 | Yes | T |
|   | CT/13/763      | 61    | F | NA      | Yes | C |

Where Ovarian tumor (T), Ascites cell block (C), Omental tumor (O) and Female (F).

**Supplementary Table 9. Patient Samples: Clinical information of commercial TMA**

| No. | Histology | Age (Years) | Sex | Grade | Stage  | Array Position |
|-----|-----------|-------------|-----|-------|--------|----------------|
| 1   | Normal    | 40          | F   | -     | -      | A1,B1          |
| 2   | Normal    | 40          | F   | -     | -      | A2,B2          |
| 3   | SC        | 53          | F   | III   | T1N0M0 | A6,B6          |
| 4   | SC        | 47          | F   | III   | T1N0M0 | C1,D1          |
| 5   | SC        | 53          | F   | III   | T1N0M0 | C2,D2          |
| 6   | SC        | 43          | F   | III   | T1N0M0 | C7,D7          |
| 7   | SC        | 45          | F   | III   | T1N0M0 | C8,D8          |
| 8   | SC        | 74          | F   | III   | T2N0M0 | I9,J9          |
| 9   | SC        | 45          | F   | III   | T2N0M0 | G6,H6          |
| 10  | SC        | 51          | F   | III   | T2N0M0 | G13,H13        |
| 11  | SC        | 44          | F   | III   | T2N0M0 | I3,J3          |
| 12  | SC        | 54          | F   | III   | T2N0M0 | I4,J4          |
| 13  | SC        | 56          | F   | III   | T2N0M0 | I11,J11        |
| 14  | SC        | 54          | F   | III   | T2N0M0 | I13,J13        |
| 15  | SC        | 51          | F   | III   | T3N1M0 | C5,D5          |
| 16  | SC        | 58          | F   | -     | T1N0M0 | A9,B9          |
| 17  | SC        | 65          | F   | -     | T1N0M0 | A11,B11        |
| 18  | SC        | 51          | F   | -     | T2N0M0 | A14,B14        |
| 19  | SC        | 56          | F   | I     | T1N0M0 | C14,D14        |
| 20  | SC        | 33          | F   | I     | T1N0M0 | E9,F9          |
| 21  | SC        | 34          | F   | I     | T2N0M0 | C15,D15        |
| 22  | SC        | 18          | F   | II    | T1N0M0 | G1,H1          |

| No. | Histology                       | Age (Years) | Sex | Grade  | Stage  | Array Position |
|-----|---------------------------------|-------------|-----|--------|--------|----------------|
| 23  | SC                              | 48          | F   | II     | T2N0M0 | G8,H8          |
| 24  | SC                              | 20          | F   | II     | T2N0M0 | A15,B15        |
| 25  | SC                              | 42          | F   | II~III | T1N0M0 | G3,H3          |
| 26  | SC                              | 42          | F   | II~III | T1N0M0 | G4,H4          |
| 27  | SC                              | 56          | F   | II~III | T2N1M0 | A7,B7          |
| 28  | Mucinous cystadenoma            | 19          | F   | -      | -      | A3,B3          |
| 29  | Thecoma                         | 35          | F   | -      | -      | A4,B4          |
| 30  | Borderline serous cystadenoma   | 42          | F   | -      | -      | A5,B5          |
| 31  | Metastatic cancer from colon    | 40          | F   | -      | -      | A8B8           |
| 32  | Sarcoma                         | 36          | F   | -      | T1N0M0 | G2,H2          |
| 33  | Dysgerminoma                    | 17          | F   | -      | -      | I1,J1          |
| 34  | Granulosa cell tumor            | 43          | F   | -      | T1N0M0 | G12,H12        |
| 35  | Endodermal sinus tumor          | 23          | F   | -      | -      | G5,H5          |
| 36  | Undifferentiated carcinoma      | 42          | F   | -      | T2N0M0 | A12,B12        |
| 37  | Undifferentiated carcinoma      | 48          | F   | -      | T2N0M0 | C3,D3          |
| 38  | Undifferentiated adenocarcinoma | 54          | F   | -      | T2N0M0 | C13,D13        |
| 39  | MC                              | 25          | F   | I      | T1N0M0 | E5,F5          |
| 40  | MC                              | 24          | F   | I      | T1N0M0 | E1,F1          |
| 41  | MC                              | 47          | F   | I      | T1N0M0 | C10,D10        |
| 42  | MC                              | 38          | F   | I      | T1N0M0 | E14,F14        |
| 43  | MC                              | 18          | F   | I      | T2N0M0 | G7,H7          |
| 44  | MC                              | 48          | F   | I      | T2N0M0 | G11,H11        |
| 45  | MC                              | 39          | F   | I      | T2N0M0 | I5,J5          |
| 46  | MC                              | 48          | F   | I~II   | T1N0M0 | I14,J14        |
| 47  | MC                              | 62          | F   | II     | T2N0M0 | I15,J15        |
| 48  | MC                              | 53          | F   | II     | T2N0M0 | I7,J7          |
| 49  | MC                              | 48          | F   | III    | T1N0M0 | E15,F15        |
| 50  | MC                              | 43          | F   | III    | T2N0M0 | C11,D11        |
| 51  | EC                              | 40          | F   | -      | T1N0M0 | E7,F7          |
| 52  | EC                              | 34          | F   | -      | T1N0M0 | E8,F8          |
| 53  | EC                              | 51          | F   | I      | T1N0M0 | E4,F4          |
| 54  | EC                              | 82          | F   | I      | T1N0M0 | C9,D9          |
| 55  | EC                              | 42          | F   | I      | T1N0M0 | E11,F11        |
| 56  | EC                              | 17          | F   | I      | T1N0M0 | E13,F13        |
| 57  | EC                              | 50          | F   | I      | T2N0M0 | E6,F6          |
| 58  | EC                              | 43          | F   | I      | T2N0M0 | I8,J8          |
| 59  | EC                              | 52          | F   | II     | T1N0M0 | I10,J10        |
| 60  | EC                              | 44          | F   | II     | T1N0M0 | C4,D4          |



| No. | Histology | Age (Years) | Sex | Grade  | Stage  | Array Position |
|-----|-----------|-------------|-----|--------|--------|----------------|
| 61  | EC        | 9           | F   | II     | T1N0M0 | A13,B13        |
| 62  | EC        | 50          | F   | II~III | T2N1M0 | A10,B10        |
| 63  | EC        | 25          | F   | II     | T2N0M0 | E3,F3          |
| 64  | EC        | 63          | F   | III    | T1N0M0 | C12,D12        |
| 65  | EC        | 68          | F   | III    | T1N0M0 | E12,F12        |
| 66  | EC        | 54          | F   | III    | T1N0M0 | I12,J12        |
| 67  | EC        | 65          | F   | III    | T2N0M0 | C6,D6          |
| 68  | EC        | 58          | F   | III    | T2N0M0 | E2,F2          |
| 69  | EC        | 52          | F   | III    | T2N0M0 | E10,F10        |
| 70  | EC        | 49          | F   | III    | T2N0M0 | G9,H9          |
| 71  | EC        | 51          | F   | III    | T2N0M0 | G10,H10        |
| 72  | EC        | 58          | F   | III    | T2N0M0 | G15,H15        |
| 73  | EC        | 50          | F   | III    | T2N0M0 | I2,J2          |
| 74  | EC        | 39          | F   | III    | T2N0M0 | I6,J6          |
| 75  | EC        | 71          | F   | III    | T3N0M0 | G14,H14        |

Where Serous adenocarcinoma (SC), Mucinous adenocarcinoma (MC), Endometrioid adenocarcinoma (EC), Female (F)

**Supplementary Table 10. List of oligonucleotides used in the study.**

| Primer Sequences |       |                            |
|------------------|-------|----------------------------|
| CDH1_RT_F        | Sigma | GTCTCCTCTTGGCTCTGC         |
| CDH1_RT_R        | Sigma | TTATGAAACCGTAGAGGC         |
| VIMENTIN_RT_F    | Sigma | GGGCCATCTTAACATTGAGCAG     |
| VIMENTIN_RT_R    | Sigma | AGTGGATGCCCTTAAAGGAAC<br>C |
| CK19_RT_F        | Sigma | CTGGCTTTTATGGCTGGTCT       |
| CK19_RT_R        | Sigma | CCAGCCTCGGAAACCTAAGT       |
| FAP_RT_F         | Sigma | TGAGTAATAGAACCATGCTTTG     |
| FAP_RT_R         | Sigma | ACAGGCGACCAGCATAAAT        |
| Slug_qPCR_F      | Sigma | CACATTAGAACTCACACGG        |
| Slug_qPCR_R      | Sigma | CTACACAGCAGCCAGATT         |
| TCF21_qPCR_F     | Sigma | CTCCAGACTCAAGACCACC        |
| TCF21_qPCR_R     | Sigma | CAGACTCGCACCTCCAAG         |
| GLI1_RT_F        | Sigma | CAGACAGAGGCCCACTC          |

|                   |          |                       |
|-------------------|----------|-----------------------|
| GLI1_RT_R         | Sigma    | CAATGGAGAGATGACCGTAG  |
| GATA4_RT_F        | Sigma    | CTCATCAAGCCTCAGCG     |
| GATA4_RT_R        | Sigma    | AGGCTCCGTCTTGATG      |
| PEG3_RT_F         | Sigma    | CCAAGAGAAGTGCCTACC    |
| PEG3_RT_R         | Sigma    | CTTGACTCCCTTGCTCTT    |
| FOXL2_RT_F        | Sigma    | GGTCGCACAGTCAAGGAG    |
| FOXL2_RT_R        | Sigma    | AGCCCTTCTTATTCTTCTCG  |
| PRRX1a_qPCR_F     | Bioserve | CCGCAGGAATGAGAGAGCCA  |
| PRRX1a_qPCR_R     | Bioserve | AACATCTTGGGAGGGACGAGG |
| PRRX1b_qPCR_F     | Bioserve | AGAGCCAAGTTCCGCAGG    |
| PRRX1b_qPCR_R     | Bioserve | GCAGGGCTATTGTTGGCAC   |
| GAPDH_RT_F        | Bioserve | CCATCACCATCTTCCAGG    |
| GAPDH_RT_R        | Bioserve | GGCTGTTGTCATACTTCTCA  |
| TGFb1_qPCR_F      | Sigma    | TTGAGCCGTGGAGGGGAAAT  |
| TGFb1_qPCR_R      | Sigma    | ATGAGAAGCAGGAAAGGC    |
| BMP7_qPCR_F       | Sigma    | CGTCAACCTCGTGGAACA    |
| BMP7_qPCR_R       | Sigma    | GCACCTGATAAACGCTGA    |
| Twist1_qPCR_F     | Sigma    | GAGCAACAGCGAGGAAGA    |
| Twist1_qPCR_R     | Sigma    | GCTCCTCGTAAGACTGCG    |
| ZEB1_qPCR_F       | Sigma    | TGGGAGGATGACAAGGA     |
| ZEB1_qPCR_R       | Sigma    | ACTGGCTTCTGGTGTGC     |
| ZEB2_qPCR_F       | Sigma    | ACACACAGGAAAAAGACCA   |
| ZEB2_qPCR_R       | Sigma    | TACGAGCCCGAGTGTGA     |
| SlugS1Ebox_ChIP_F | Sigma    | TGGCAGAAGGAAAGGAAA    |
| SlugS1Ebox_ChIP_R | Sigma    | TCACAGAGGCATAATCCAG   |
| SlugS2Ebox_ChIP_F | Sigma    | CCAGCAAATAAATACCAA    |
| SlugS2Ebox_ChIP_R | Sigma    | CTGGAACCTGGAGTAAAA    |

|                       |       |                                     |
|-----------------------|-------|-------------------------------------|
| SlugS3Ebox_ChIP_F     | Sigma | GTGACTGTTGGAAGAAATAA                |
| SlugS3Ebox_ChIP_R     | Sigma | AAGCATCTCTGTCCATTG                  |
| SlugS4Ebox_ChIP_F     | Sigma | TTTGTTCTTTCCTTATTCTT                |
| SlugS4Ebox_ChIP_R     | Sigma | TGCTTTTATGTGGTGCTA                  |
| SlugS5Ebox_ChIP_F     | Sigma | AGATGCCACTTCCAAATA                  |
| SlugS5Ebox_ChIP_R     | Sigma | AGAGGTTTCAGATTTTCAGC                |
| SlugS6Ebox_ChIP_F     | Sigma | GCTGAAATCTGAACCTCT                  |
| SlugS6Ebox_ChIP_R     | Sigma | AATGCTTCTTGACCAGGA                  |
| SlugS7Ebox_ChIP_F     | Sigma | GGCTCAGTTCGTAAAGGA                  |
| SlugS7Ebox_ChIP_R     | Sigma | ATGTGTGTCCAGTTCGCT                  |
| S1Ebox_EMSA_Sense     | Sigma | GTCTGAGCAGAGCACCTGTTTC<br>GTCTGACT  |
| S1Ebox_EMSA_AntiSense | Sigma | AGTCAGACGAAACAGGTGCT<br>CTGCTCAGAC  |
| S2Ebox_EMSA_Sense     | Sigma | CTCTCATAAACCCAGGTGCCTA<br>CATCCGAA  |
| S2Ebox_EMSA_AntiSense | Sigma | TTCGGATGTAGGCACCTGGGT<br>TTATGAGAG  |
| S3Ebox_EMSA_Sense     | Sigma | TTTTTCCTCCAGCACCTGTT<br>AGAAACAAGA  |
| S3Ebox_EMSA_AntiSense | Sigma | TCTTGTTTCTAACAGGTGCT<br>GGAGGAAAAA  |
| S4Ebox_EMSA_Sense     | Sigma | TTTAAAATAAACACCTGAAA<br>GTATTTTTA   |
| S4Ebox_EMSA_AntiSense | Sigma | TAAAAATACTTTCAGGTGGT<br>TTATTTTTAA  |
| S5Ebox_EMSA_Sense     | Sigma | TTCCTCTGTTACAGCTGTC<br>CCAGAGGGAG   |
| S5Ebox_EMSA_AntiSense | Sigma | CTCCCTCTGGGACAGCTGT<br>GAACAGAGGAA  |
| S6Ebox_EMSA_Sense     | Sigma | ATCTGAACCTCTCAGCTGTG<br>ATTGGATCTT  |
| S6Ebox_EMSA_AntiSense | Sigma | AAGATCCAATCACAGCTGAG<br>AGGTTTCAGAT |
| S7Ebox_EMSA_Sense     | Sigma | GTCCGTCTGCCGCACCTGA<br>GCACGGCCCCT  |
| S7Ebox_EMSA_Antisense | Sigma | AGGGGCCGTGCTCAGGTGC<br>GGCAGACGGAC  |

**Supplementary Table 11. List of antibodies and IHC chemicals used in the study**

| <b>Antibodies</b>                          |                        |                |
|--------------------------------------------|------------------------|----------------|
| Mouse anti- Slug                           | SCBT*                  | Cat#sc-166476  |
| Rabbit anti-Slug                           | Abcam                  | Cat#ab27568    |
| Rabbit anti-TCF21                          | Abcam                  | Cat#ab32981    |
| Mouse anti-E-cadherin                      | BD Pharmingen          | Cat#610181     |
| Mouse anti-E-cadherin                      | Biogenex               | Cat#AM390-5M   |
| Rabbit anti - ZO1                          | SCBT                   | Cat#sc-10804   |
| Rabbit anti - N-cadherin                   | Cell Signalling        | Cat#13116      |
| Mouse anti - CK15                          | SCBT                   | Cat#sc-47697   |
| Mouse anti-CK19                            | Sigma                  | Cat#SAB3300019 |
| Mouse anti-Vimentin                        | Sigma                  | Cat#V6630      |
| Mouse anti-FAP                             | Abcam                  | Cat#ab54651    |
| Rabbit anti-GAPDH                          | Sigma                  | Cat#G9545      |
| Rabbit anti- TGFbR2                        | Abcam                  | Cat#ab186838   |
| Rabbit anti- BMPR2                         | Abcam                  | Cat#ab56023    |
| Rabbit anti-PARP1 (H-300)                  | SCBT                   | Cat#sc-25780   |
| Rabbit anti-ANXA2                          | In-house               |                |
| Alexa fluor 488 donkey anti- rabbit        | Invitrogen             | Cat#R37118     |
| Alexa fluor 488 donkey anti- mouse         | Invitrogen             | Cat#A-21202    |
| Alexa Fluor 647 donkey anti rabbit         | Invitrogen             | Cat#A-31573    |
| Alexa Fluor 647 goat anti mouse            | Invitrogen             | Cat#A-21242    |
| Goat anti-mouse HRP                        | Jackson Immunoresearch | Cat#115035150  |
| Goat anti-rabbit HRP                       | Jackson Immunoresearch | Cat#111035144  |
| <b>Immunohistochemistry Chemicals Used</b> |                        |                |
| TBS pH 7.2-7.4                             | Himedia                | Cat#ML029      |

|                                                       |                      |               |
|-------------------------------------------------------|----------------------|---------------|
| Hydrogen peroxide                                     | Qualigens            | Cat#18755     |
| Protein block                                         | Biogenex             | Cat#HK085-5KE |
| Antigen retrieval buffer,<br>Citrate Buffer, pH 6.1   | Himedia              | Cat#ML089     |
| Antigen retrieval buffer,<br>Tris-EDTA Buffer, pH 9.0 | Himedia              | Cat#ML087     |
| Harris's hematoxylin                                  | In-house preparation |               |
| DAB                                                   | Thermo Pierce        | Cat#34065     |
| DPX                                                   | Qualigens            | Cat#18404     |
| Poly-L-Lysine                                         | Sigma-Aldrich        | Cat#P8920     |
| Hyaluronidase enzyme                                  | Sigma-Aldrich        | Cat#H-3504    |
| Alcian blue 8GX                                       | Fluka                | Cat#5500      |
| Nuclear Fast Red Solution                             | Sigma-Aldrich        | Cat#N3020     |
